# Supplementary material for: Fast airborne aerosol size and chemistry measurements above Mexico City and Central Mexico during the MILAGRO campaign
Source: Copernicus journal article supplement (doi:10.5194/acp-8-4027-2008), 2008-07-25

**Supplementary information for the paper**

**“Fast Airborne Aerosol Size and Chemistry Measurements above Mexico City and Central Mexico during the MILAGRO Campaign”**

**by DeCarlo et al.**

**Atmospheric Chemistry and Physics, 2008**

Figure S-1: A Google Earth image of the flight track from Research Flight 12. Also shown in this figure are the locations of the ground supersites T0, T1, and T2. The Popocatepetl volcano and the location of the 2 spirals for RF 12 are also marked on the figure.

Figure S-2: A map of RF 2, different periods from Figure 11 are denoted according to the legend, and periods I-III are marked on the map with arrows.

Figure S-1:

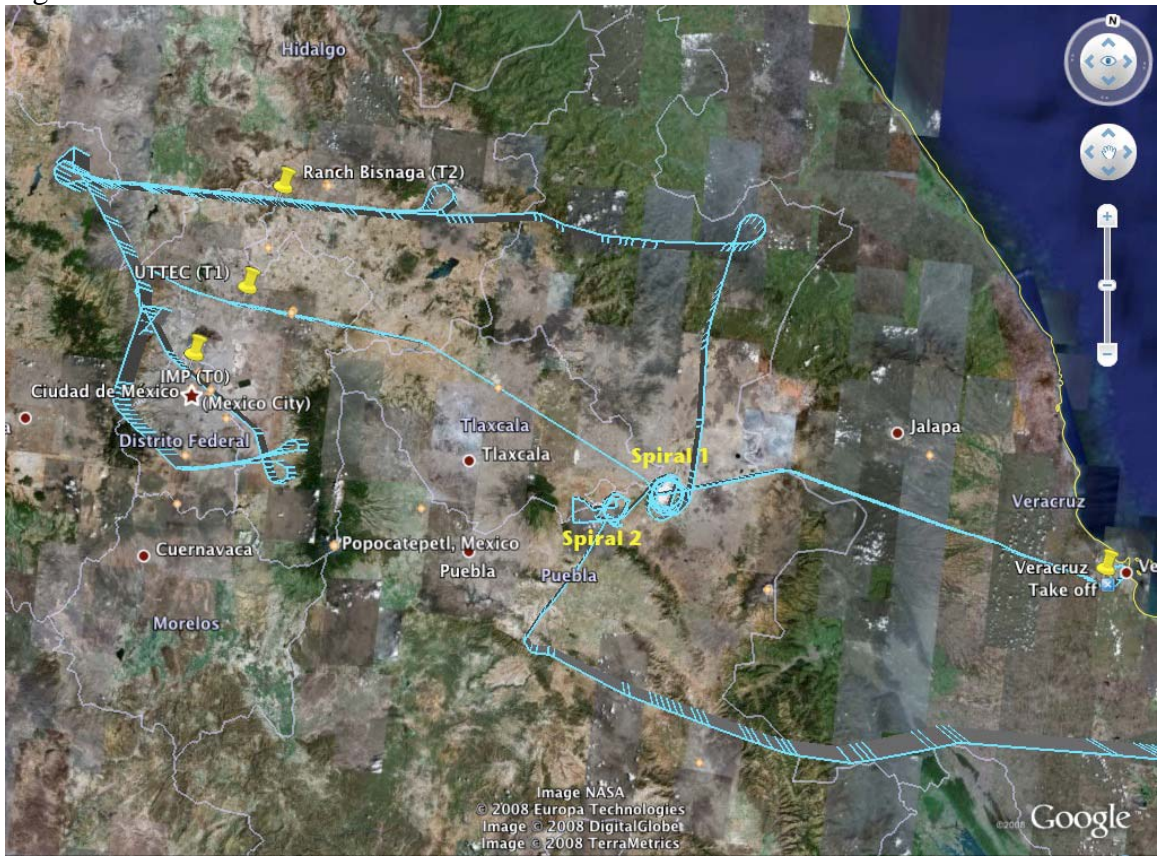

Figure S-2:

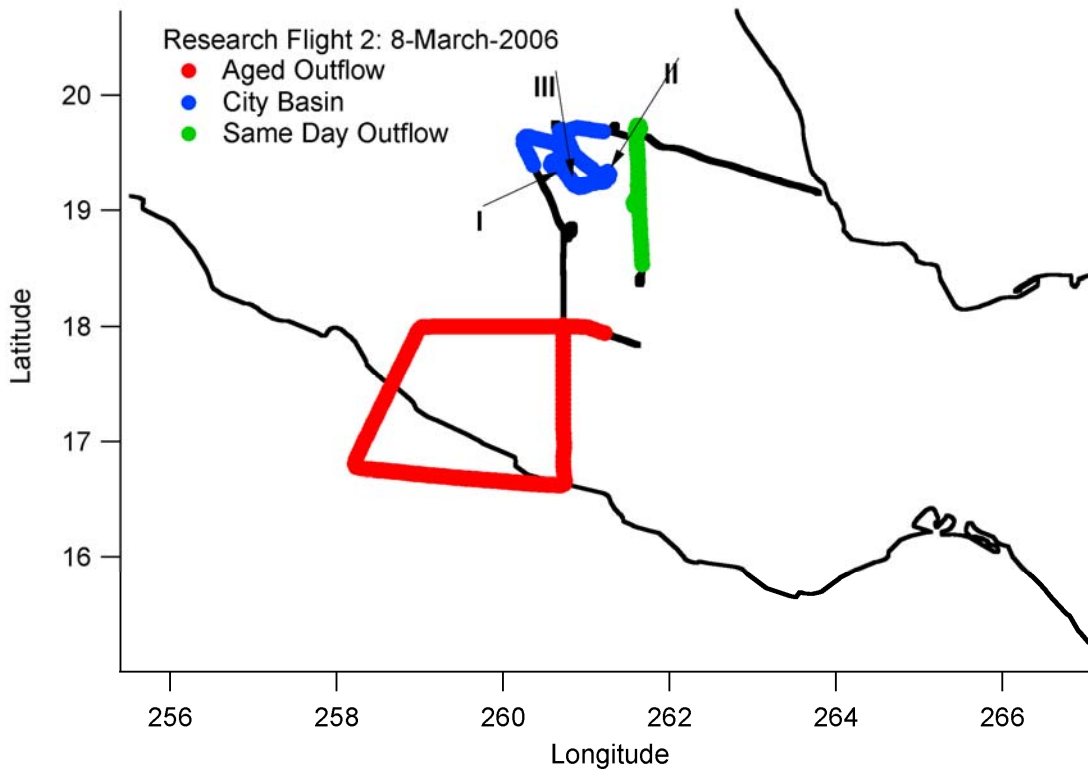

Supplement: Supplementary file [file acp-8-4027-2008-supplement.pdf]
